# Supplementary material
Source: PubMed Central journal article supplement (PMC10270731)
Supplement: NIHMS1899213-supplement-1.pdf [file NIHMS1899213-supplement-1.pdf]

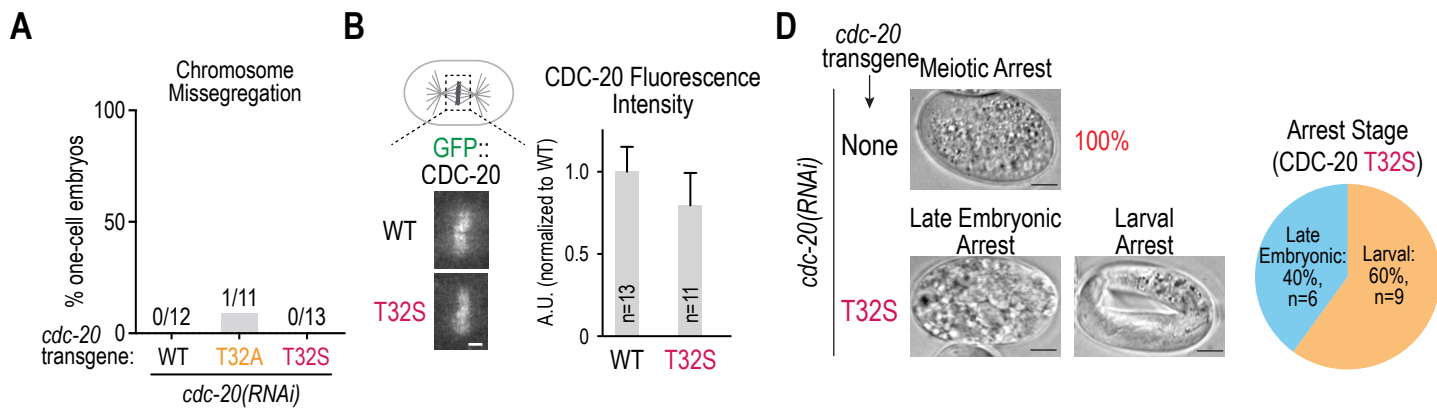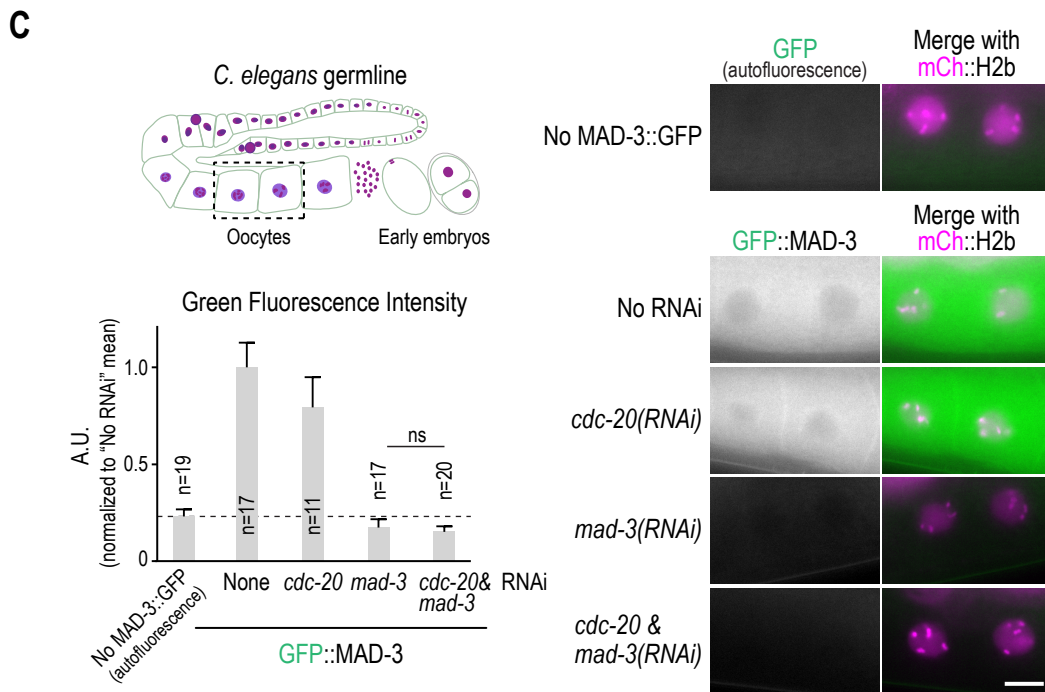

**Figure S1: Additional analysis of CDC-20 T32A and T32S mutants (related to Figure 1).**

**(A)** Chromosome missegregation in the indicated conditions. Missegregation was scored as visible lagging chromatin in anaphase (for an example image, see *Figure 2G*). No missegregation was observed for WT or T32S CDC-20; for T32A CDC-20, one of eleven imaged embryos exhibited mild lagging chromatin. **(B)** Localization analysis of GFP-fused WT and T32S CDC-20. *n* is number of embryos imaged per condition. Scale bar, 2  $\mu\text{m}$ . **(C)** Assessment of the efficiency of MAD-3 depletion using an *in situ*-tagged GFP::MAD-3 strain. Oocytes preceding the spermatheca were imaged for the indicated conditions. A “No GFP::MAD-3” strain was used to measure autofluorescence in the green channel. Both *mad-3(RNAi)* alone and the *cdc-20&mad-3(RNAi)* mixture used for the experiment in *Figure 1E* were equally effective at reducing GFP::MAD-3 signal to the autofluorescence background. *n* is the number of oocytes imaged and analyzed. Scale bar, 10  $\mu\text{m}$ . **(D)** Phenotypes of arrested/dead embryos and larvae observed with T32S CDC-20. Chart on the right quantifies the frequency of observed arrest states. When no transgene is present, CDC-20 depletion leads to meiotic arrest, which is shown on top. Scale bar, 10  $\mu\text{m}$ . All error bars are the 95% confidence interval.

**A**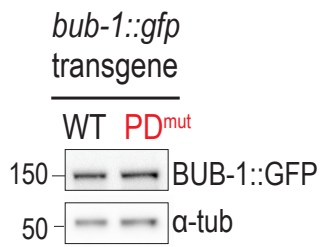**B**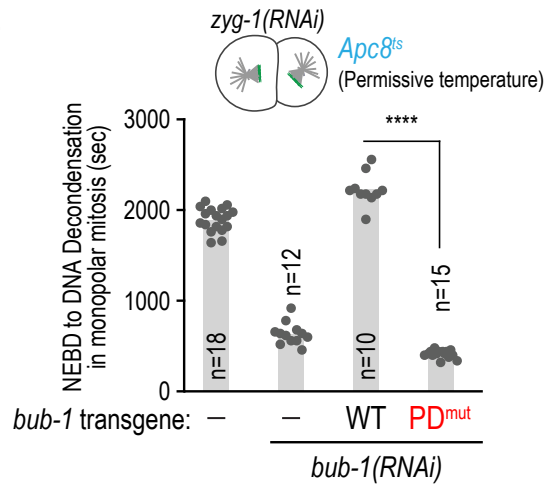**C**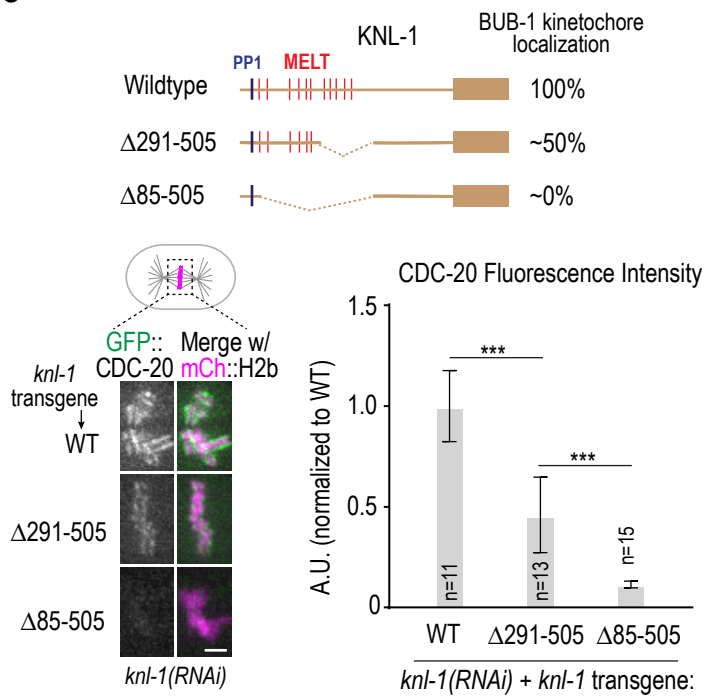**D**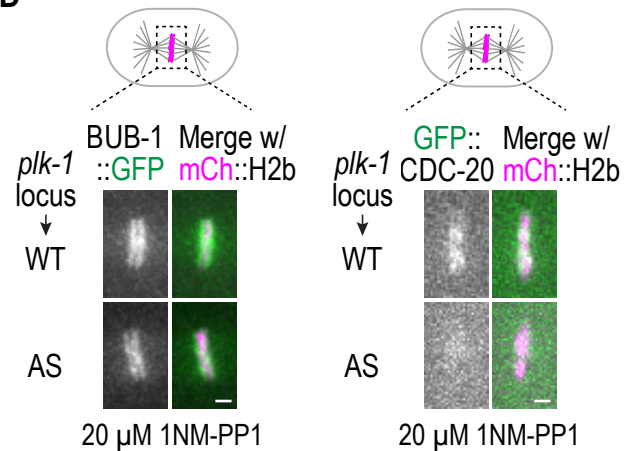**E**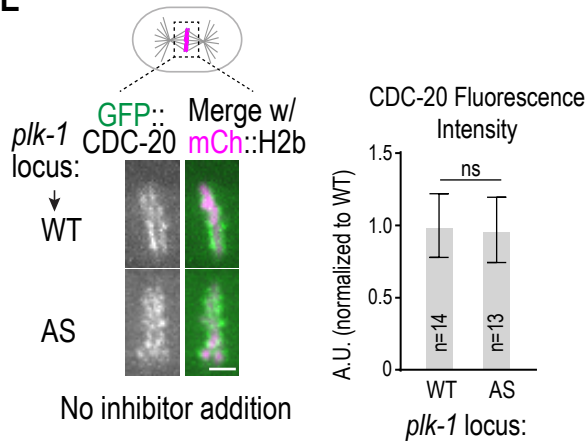

**Figure S2: Additional analysis of PLK-1 docking mutant BUB-1 and of PLK-1 kinase activity inhibition (related to Figures 2 & 3).**

**(A)** Immunoblot of WT and PD<sup>mut</sup> BUB-1::GFP expressed from single-copy transgene insertions. PD<sup>mut</sup> BUB-1 is expressed at similar level to WT BUB-1.  $\alpha$ -tubulin serves as a loading control. **(B)** Analysis of spindle checkpoint signaling in PD<sup>mut</sup> BUB-1. Spindle checkpoint signaling at unattached kinetochores was analyzed using monopolar spindle formation in 2-cell embryos induced by depletion of ZYG-1, which is essential for centriole duplication; *Apc8<sup>ts</sup>* at the permissive temperature was used to enhance sensitivity of the checkpoint assay<sup>S1</sup>. Time from NEBD to chromosome decondensation was monitored from timelapse movies of GFP::H2b. Depletion of BUB-1 abolishes checkpoint signaling and is rescued by expression of RNAi-resistant transgene-encoded WT BUB-1. By contrast, PD<sup>mut</sup> BUB-1 failed to rescue, which is consistent with the inability of CDC-20 to localize to kinetochores in this mutant. *n* is the number of embryos quantified. **(C)** CDC-20 localization analysis in KNL-1 mutants that partially or completely eliminate BUB-1 kinetochore localization. Repetitive MELT motifs in the KNL-1 N-terminus recruit BUB-1; the  $\Delta$ 291-505 mutant reduces BUB-1 levels by ~50%, whereas the  $\Delta$ 85-505 mutant eliminates BUB-1 localization<sup>S2</sup>. CDC-20 localization appears to parallel that of BUB-1. *n* is the number of embryos imaged and quantified. **(D)** Additional examples of BUB-1::GFP and GFP::CDC-20 localization following temporally-controlled PLK-1 inhibition. Scale bar, 2  $\mu$ m. **(E)** Images and quantification of CDC-20 localization in embryos expressing either WT or AS PLK-1. Embryos were imaged without permeabilization and inhibitor addition. There is no significant change in CDC-20 kinetochore localization between the two conditions. *n* is the number of embryos quantified. Scale bar, 2  $\mu$ m. All error bars are the 95% confidence interval. p-values are from unpaired t-tests; \*\*\*\*: p<0.0001; \*\*\*: p<0.001; ns: not significant.

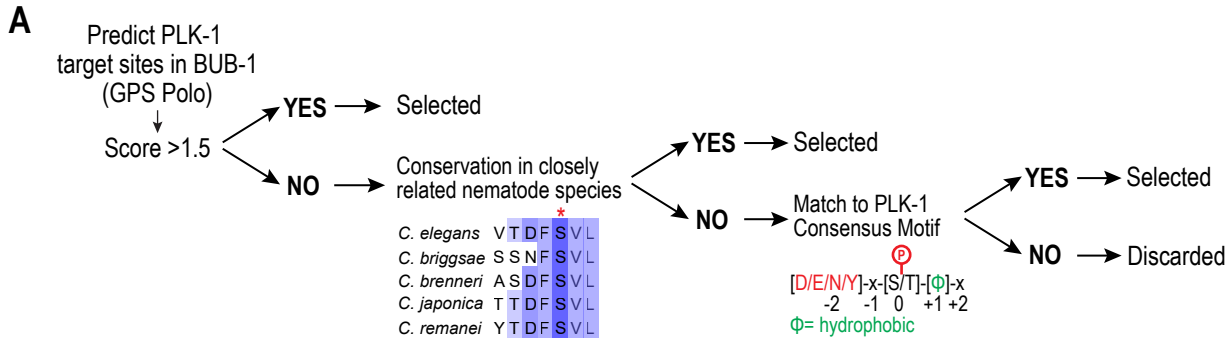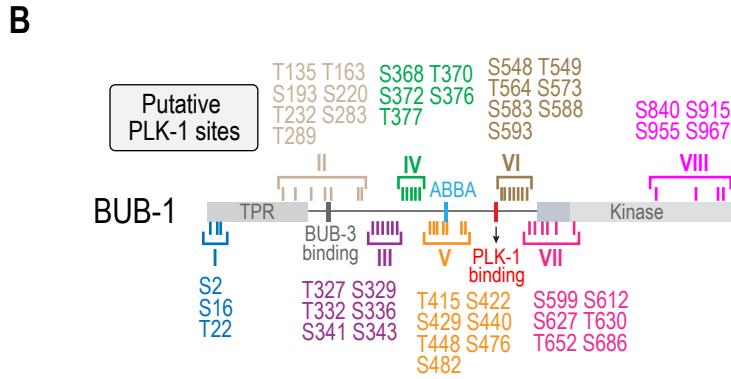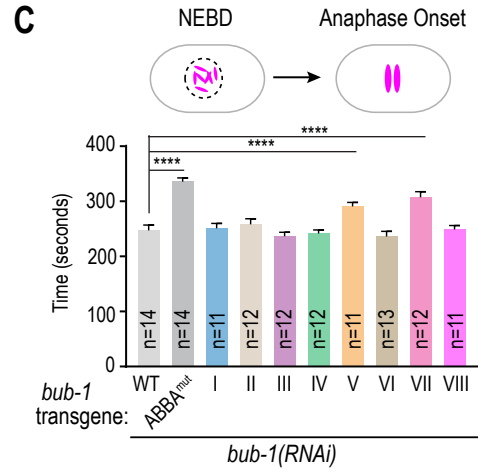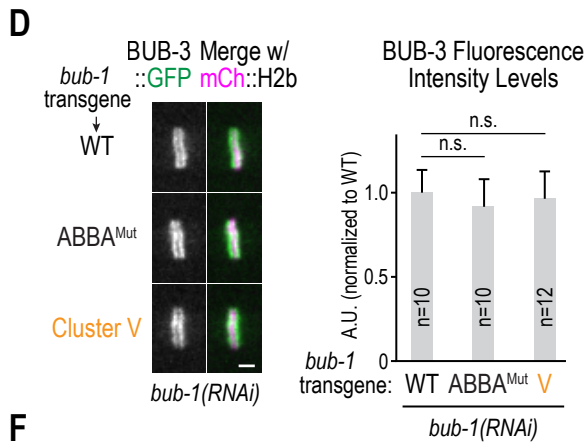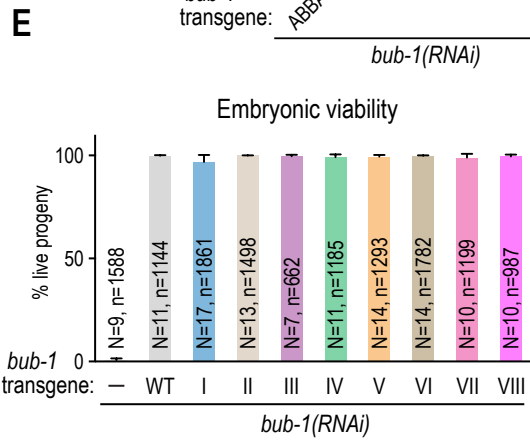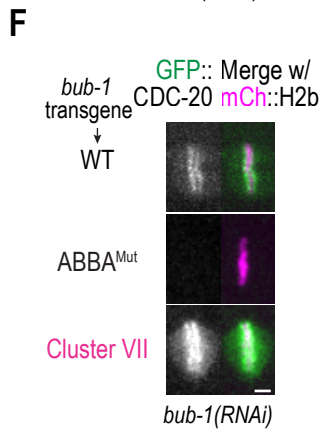

**Figure S3: Selection and analysis of putative PLK-1 sites in BUB-1 (related to Figure 3).**

**(A)** Schematic of approach used to select 45 putative PLK-1 target sites in BUB-1. **(B)** List of sites in the 8 clusters that were mutated to alanine. **(C)** NEBD-anaphase onset interval in the cluster mutants. **(D)** Analysis of BUB-3::GFP localization in the indicated conditions. *(left)* Example images of BUB-3::GFP localization; *(right)* quantification of BUB-3::GFP signal on aligned chromosomes. BUB-3 requires BUB-1 for its kinetochore localization; normal BUB-3 localization in the Cluster V mutant indicates that the 7 sites mutated do not affect BUB-1 kinetochore localization. **(E)** Embryonic viability analysis for the indicated conditions. *N* is number of worms analyzed and *n* is the total number of embryos scored. **(F)** Image of CDC-20 hyper-localization in the Cluster VII mutant. For quantification, see *Figure 3F*. *n* is the number of embryos quantified. Scale bar, 2  $\mu$ m. All error bars are the 95% confidence interval. p-values are from unpaired t-tests; \*\*\*\*:  $p < 0.0001$ ; n.s.= not significant.

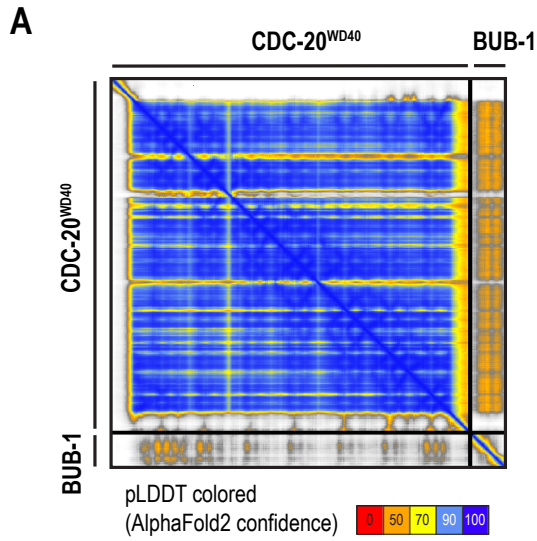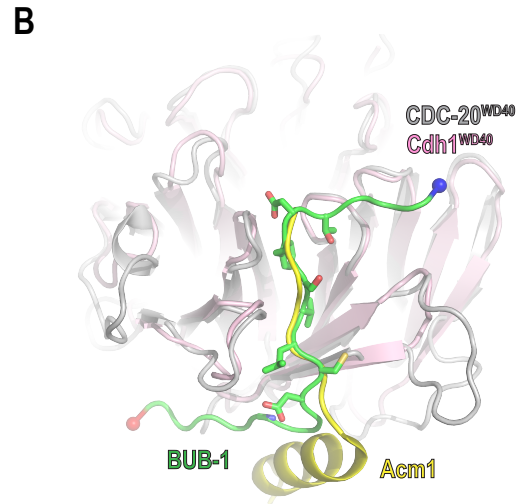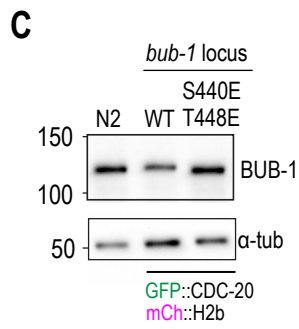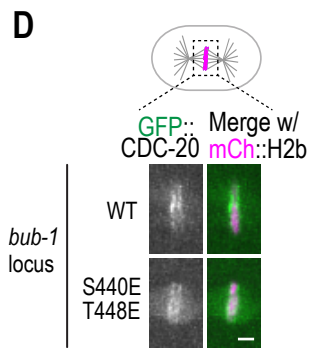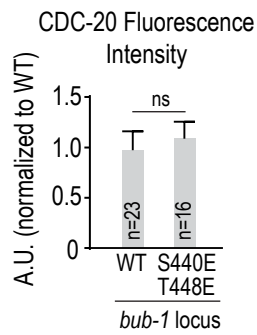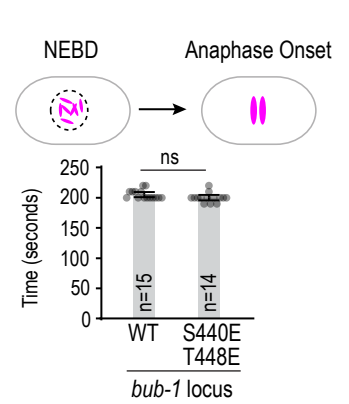

**Figure S4: Alphafold model of CDC-20 WD40 domain interaction with the BUB-1 ABBA region and characterization of phosphomimetic BUB-1 mutants (related to Figure 4).**

**(A)** Predicted alignment error (PAE) plot of the confidence of the AlphaFold2 model shown in *Figure 4E*. **(B)** Structural superposition of *C. elegans* CDC-20 WD40 domain::BUB-1 ABBA motif model with the structure of *S. cerevisiae* Cdh1::Acm1 A motif (PDB ID 4BH6). The root mean square deviation for the superposition of *S. cerevisiae* Cdh1 WD40 with *C. elegans* CDC-20 WD40 is 0.76 Å for 212 C $\alpha$  atoms. **(C)** Immunoblot of the indicated conditions. The WT and S440E;T448E lanes are from the strain expressing GFP::CDC-20 and mCh::H2b in which the CRISPR/Cas9 editing to introduce the phosphomimetic mutations was performed. The N2 lane is from the wildtype N2 strain. **(D)** Images and quantification of CDC-20 localization for the indicated conditions. The phosphomimetic substitutions S440E;T448E did not perturb CDC-20 kinetochore localization. Data for wildtype is same as shown in *Figure 4B*. *n* is the number of embryos quantified. Scale bar, 2  $\mu$ m. **(E)** NEBD-anaphase onset interval comparing WT and phosphomimetic S440E;T448E BUB-1. No significant change in mitotic duration is observed with the phosphomimetic mutant. Data for wildtype is same as shown in *Figure 4C*. *n* is the number of embryos quantified. p-values are from unpaired t-tests; n.s.= not significant.



| Residue # | Sequence         | Score | Score > 1.5 | Consensus | Conserved ? (S or T) |
|-----------|------------------|-------|-------------|-----------|----------------------|
| 2         | *****MSHIRVAFA   | 1.529 | YES         | No        | YES                  |
| 16        | APLDTNPSTCGLETF  | 1.051 | No          | YES       | YES                  |
| 22        | PSTCGLETFATQIET  | 0.71  | No          | YES       | No                   |
| 135       | LSERIEMTAIESGFR  | 2.395 | YES         | YES       | No                   |
| 163       | MFTRPDETMDLFRFN  | 3.062 | YES         | YES       | YES                  |
| 193       | HNVPINNSGKAAFPG  | 1.732 | YES         | YES       | No                   |
| 220       | RPNYHGISIEEFRFA  | 1.583 | YES         | No        | YES                  |
| 232       | RFAKWKDTFGEDVDD  | 1.094 | No          | YES       | No                   |
| 283       | NPRRRHLSPVSEKTV  | 1.728 | YES         | No        | No                   |
| 289       | LSPVSEKTVDDDEEEK | 3.243 | YES         | YES       | No                   |
| 327       | ENPPATVTLSSDTKS  | 1.891 | YES         | No        | YES                  |
| 329       | PPATVTLSSDTKSAS  | 1.663 | YES         | No        | YES                  |
| 332       | TVTLSSDTKSASEKD  | 1.616 | YES         | No        | YES                  |
| 336       | SSDTKSASEKDVSDS  | 2.047 | YES         | No        | No                   |
| 341       | SASEKDVSDSDDADD  | 4.562 | YES         | YES       | YES                  |
| 343       | SEKDVSDSDDADDDE  | 2.018 | YES         | No        | No                   |
| 368       | DGNPPDRSTSISSNY  | 3.134 | YES         | YES       | No                   |
| 370       | NPPDRSTSISSNYST  | 3.457 | YES         | No        | No                   |
| 372       | PDRSTSISSNYSTAS  | 1.594 | YES         | No        | YES                  |
| 376       | TSISSNYSTASARTS  | 2.572 | YES         | YES       | YES                  |
| 377       | SISSNYSTASARTSK  | 0.569 | No          | YES       | YES                  |
| 415       | VHLASEKTMVLGDDS  | 2.681 | YES         | YES       | YES                  |
| 422       | TMVLGDDSVFVPERS  | 4.355 | YES         | YES       | No                   |
| 429       | SVFVPERSLATTQIV  | 2.246 | YES         | YES       | No                   |
| 440       | TQIVTDFSVLCDPDP  | 3.337 | YES         | YES       | YES                  |
| 448       | VLCDPDPTMTITQER  | 2.688 | YES         | YES       | YES                  |
| 476       | EAAEPEESQKVEESE  | 3.293 | YES         | YES       | No                   |
| 482       | ESQKVEESEVQPEIV  | 4.536 | YES         | YES       | No                   |
| 548       | FGNKEEESTHEQEAP  | 2.645 | YES         | YES       | No                   |
| 549       | GNKEEESTHEQEAPV  | 1.634 | YES         | YES       | No                   |
| 564       | FVAPTSSTFSKLTRR  | 2.775 | YES         | YES       | No                   |
| 573       | SKLTRRKS LAANQAV | 2.587 | YES         | No        | YES                  |
| 583       | ANQAVQPSVTESSKP  | 4.768 | YES         | No        | No                   |
| 588       | QPSVTESSKPERSDP  | 3.757 | YES         | YES       | No                   |
| 593       | ESSKPERSDPKDSSI  | 3.051 | YES         | YES       | No                   |
| 599       | RSDPKDSSIDCLTAN  | 4.931 | YES         | YES       | YES                  |
| 612       | ANLGRRLSIGADEIP  | 1.837 | YES         | No        | YES                  |
| 627       | NLTENNESEITGCKI  | 2.833 | YES         | YES       | No                   |

|     |                     |       |     |     |     |
|-----|---------------------|-------|-----|-----|-----|
| 630 | ENNESEITGCKIRRR     | 1.446 | No  | YES | YES |
| 652 | DINPWDETLRKKLMC     | 1.837 | YES | YES | No  |
| 686 | ALRDCEVSGEKLHIQ     | 2.217 | YES | YES | No  |
| 840 | DALMSNDSFVIKIID     | 2.163 | YES | YES | No  |
| 915 | GASVGDYSLNVDIKR     | 3.822 | YES | YES | No  |
| 955 | DWNILIKSFSEIWNE     | 1.659 | YES | YES | No  |
| 967 | WNEKFEASGWRQAV<br>S | 2.014 | YES | YES | No  |

**Table S1: List of sites mutated in clustered mutagenesis screen (related to Figure 3D-F)**

## Supplemental References

- S1. Kim, T., Lara-Gonzalez, P., Prevo, B., Meitinger, F., Cheerambathur, D.K., Oegema, K., and Desai, A. (2017). Kinetochores accelerate or delay APC/C activation by directing Cdc20 to opposing fates. *Genes Dev* *31*, 1089-1094. [10.1101/gad.302067.117](https://doi.org/10.1101/gad.302067.117).
- S2. Moyle, M.W., Kim, T., Hattersley, N., Espeut, J., Cheerambathur, D.K., Oegema, K., and Desai, A. (2014). A Bub1-Mad1 interaction targets the Mad1-Mad2 complex to unattached kinetochores to initiate the spindle checkpoint. *J Cell Biol* *204*, 647-657. [10.1083/jcb.201311015](https://doi.org/10.1083/jcb.201311015).
